# Supplementary material for: A chemogenomics view on protein-ligand spaces
Source: PubMed Central journal article supplement (PMC2697636; doi:10.1186/1471-2105-10-s6-s13), 2009-06-16
Supplement: 1471-2105-10-S6-S13-S5.pdf [file 1471-2105-10-S6-S13-S5.pdf]

Protein Descriptors  
component 1 vs. component 2

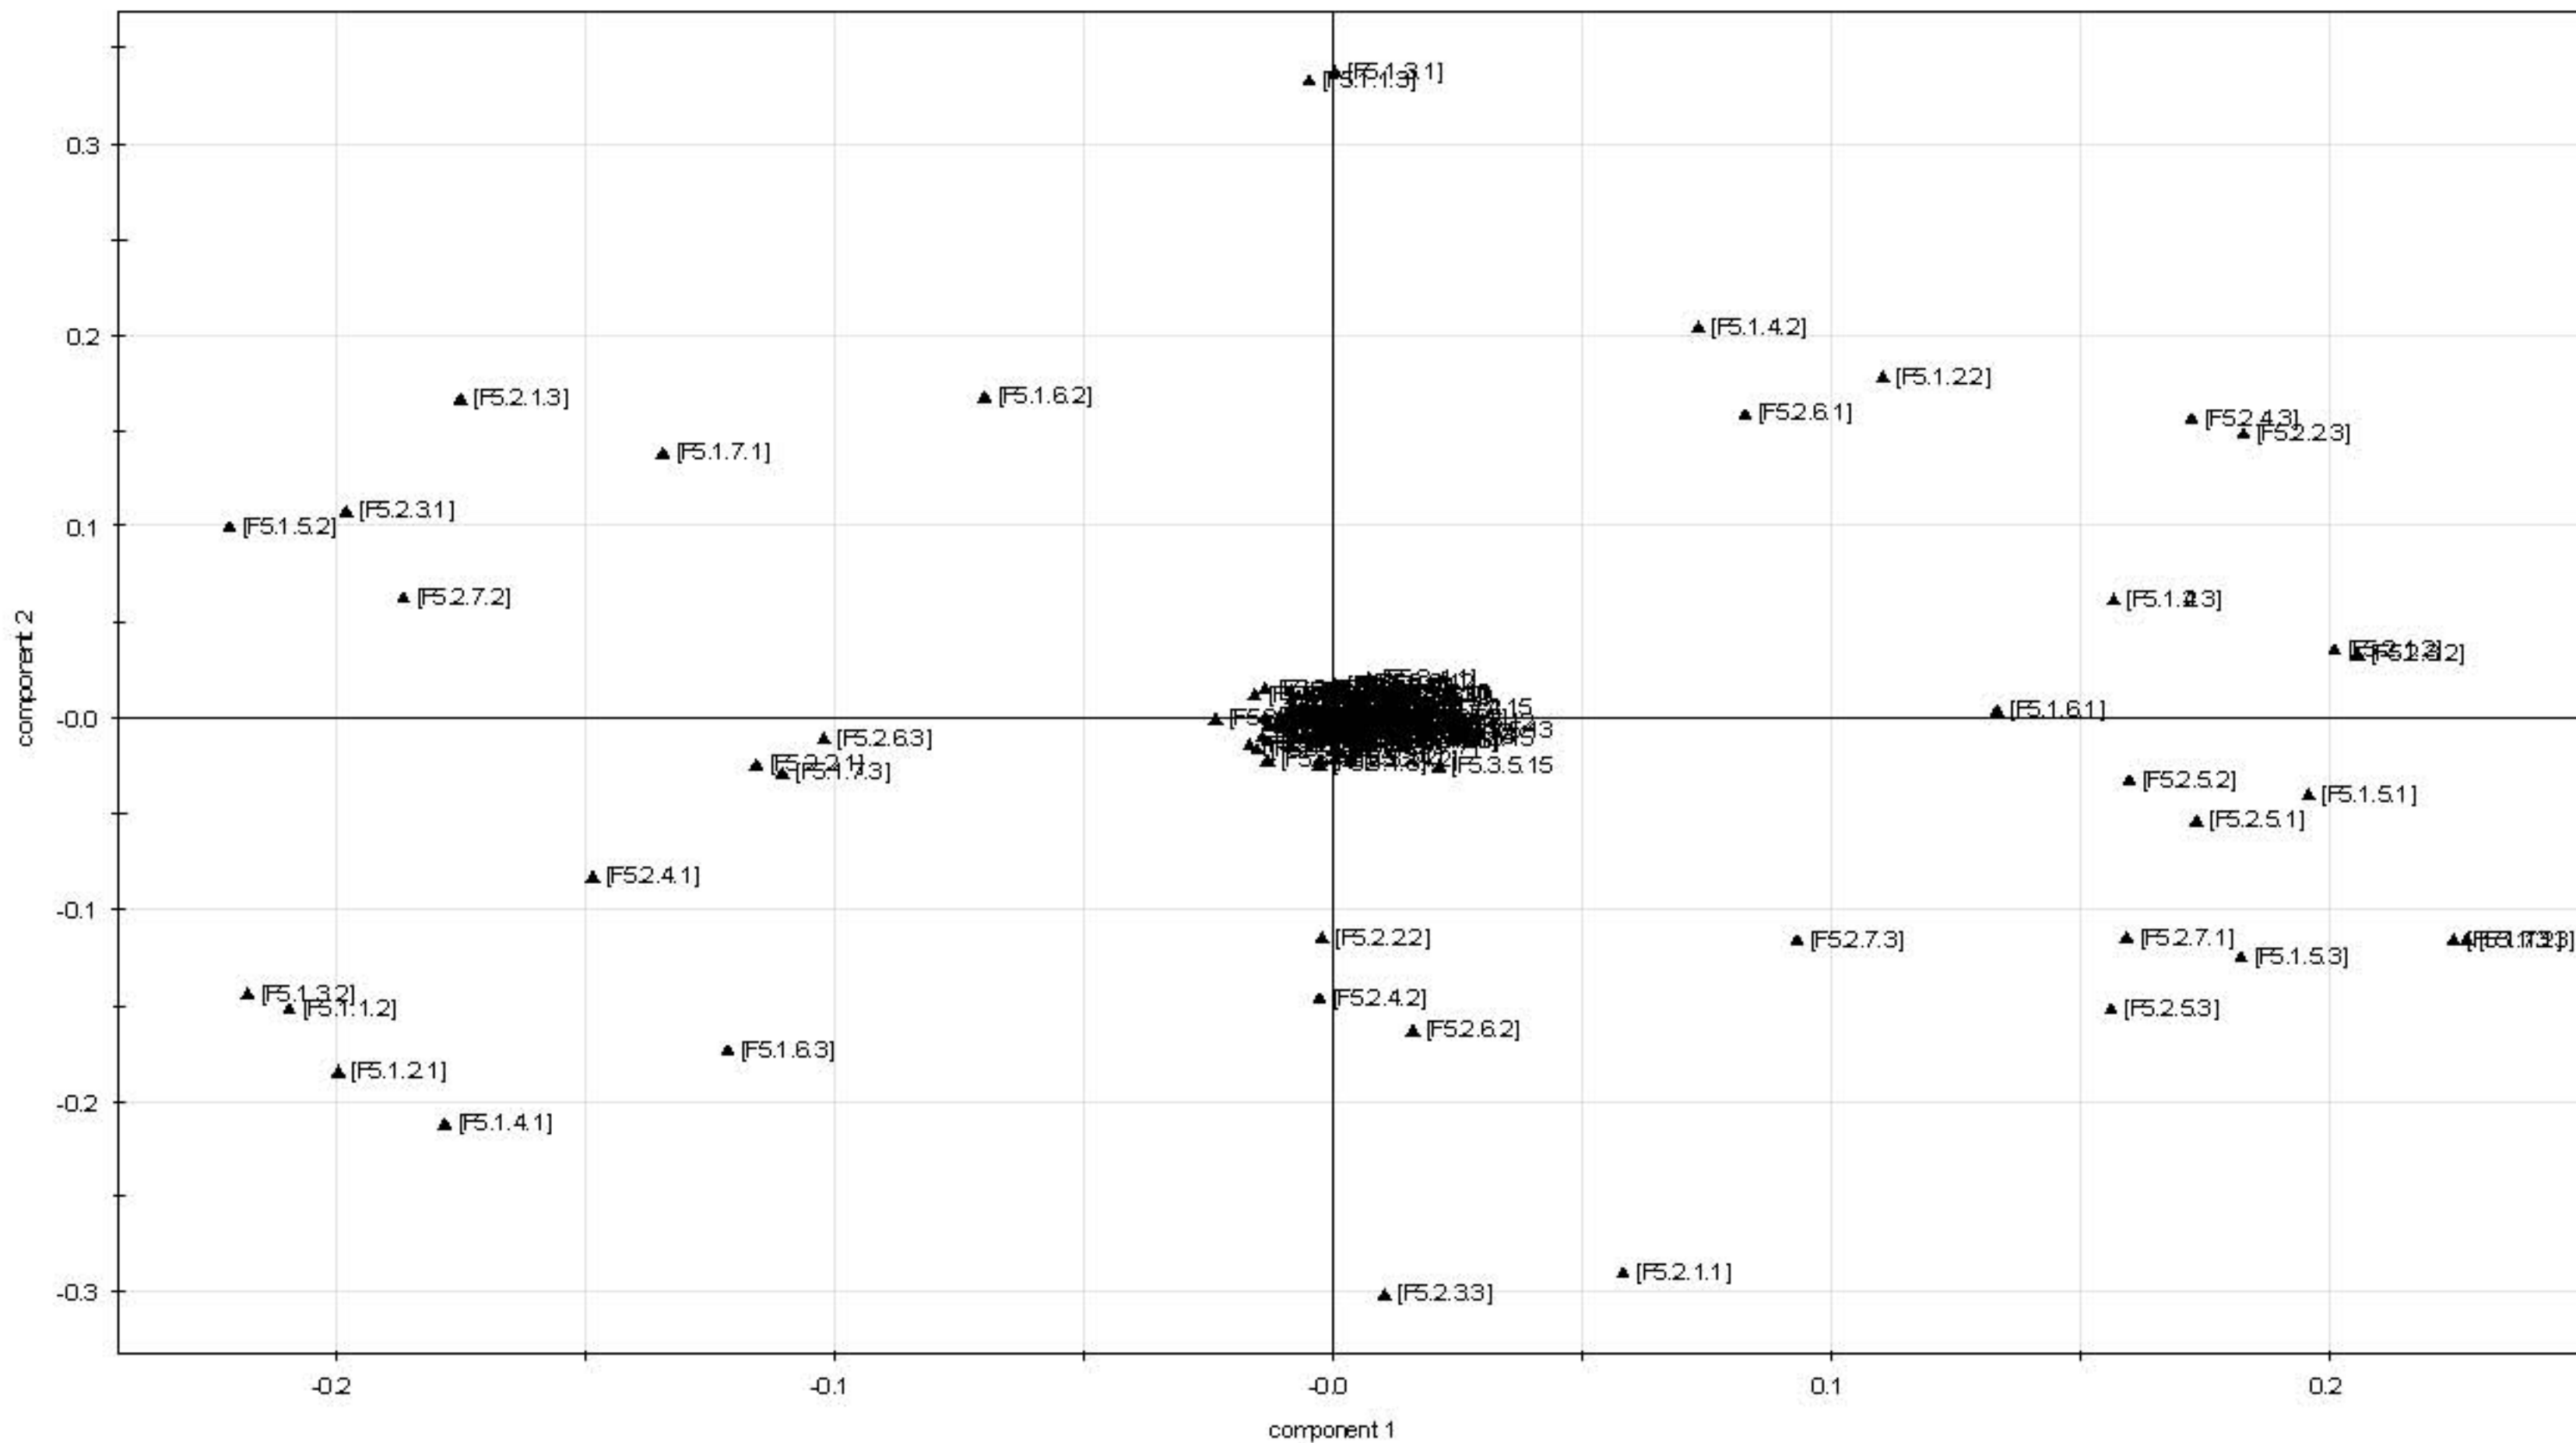

P2X[1] = 0.250178 P2X[2] = 0.119381

Protein Descriptors  
component 2 vs. component 3

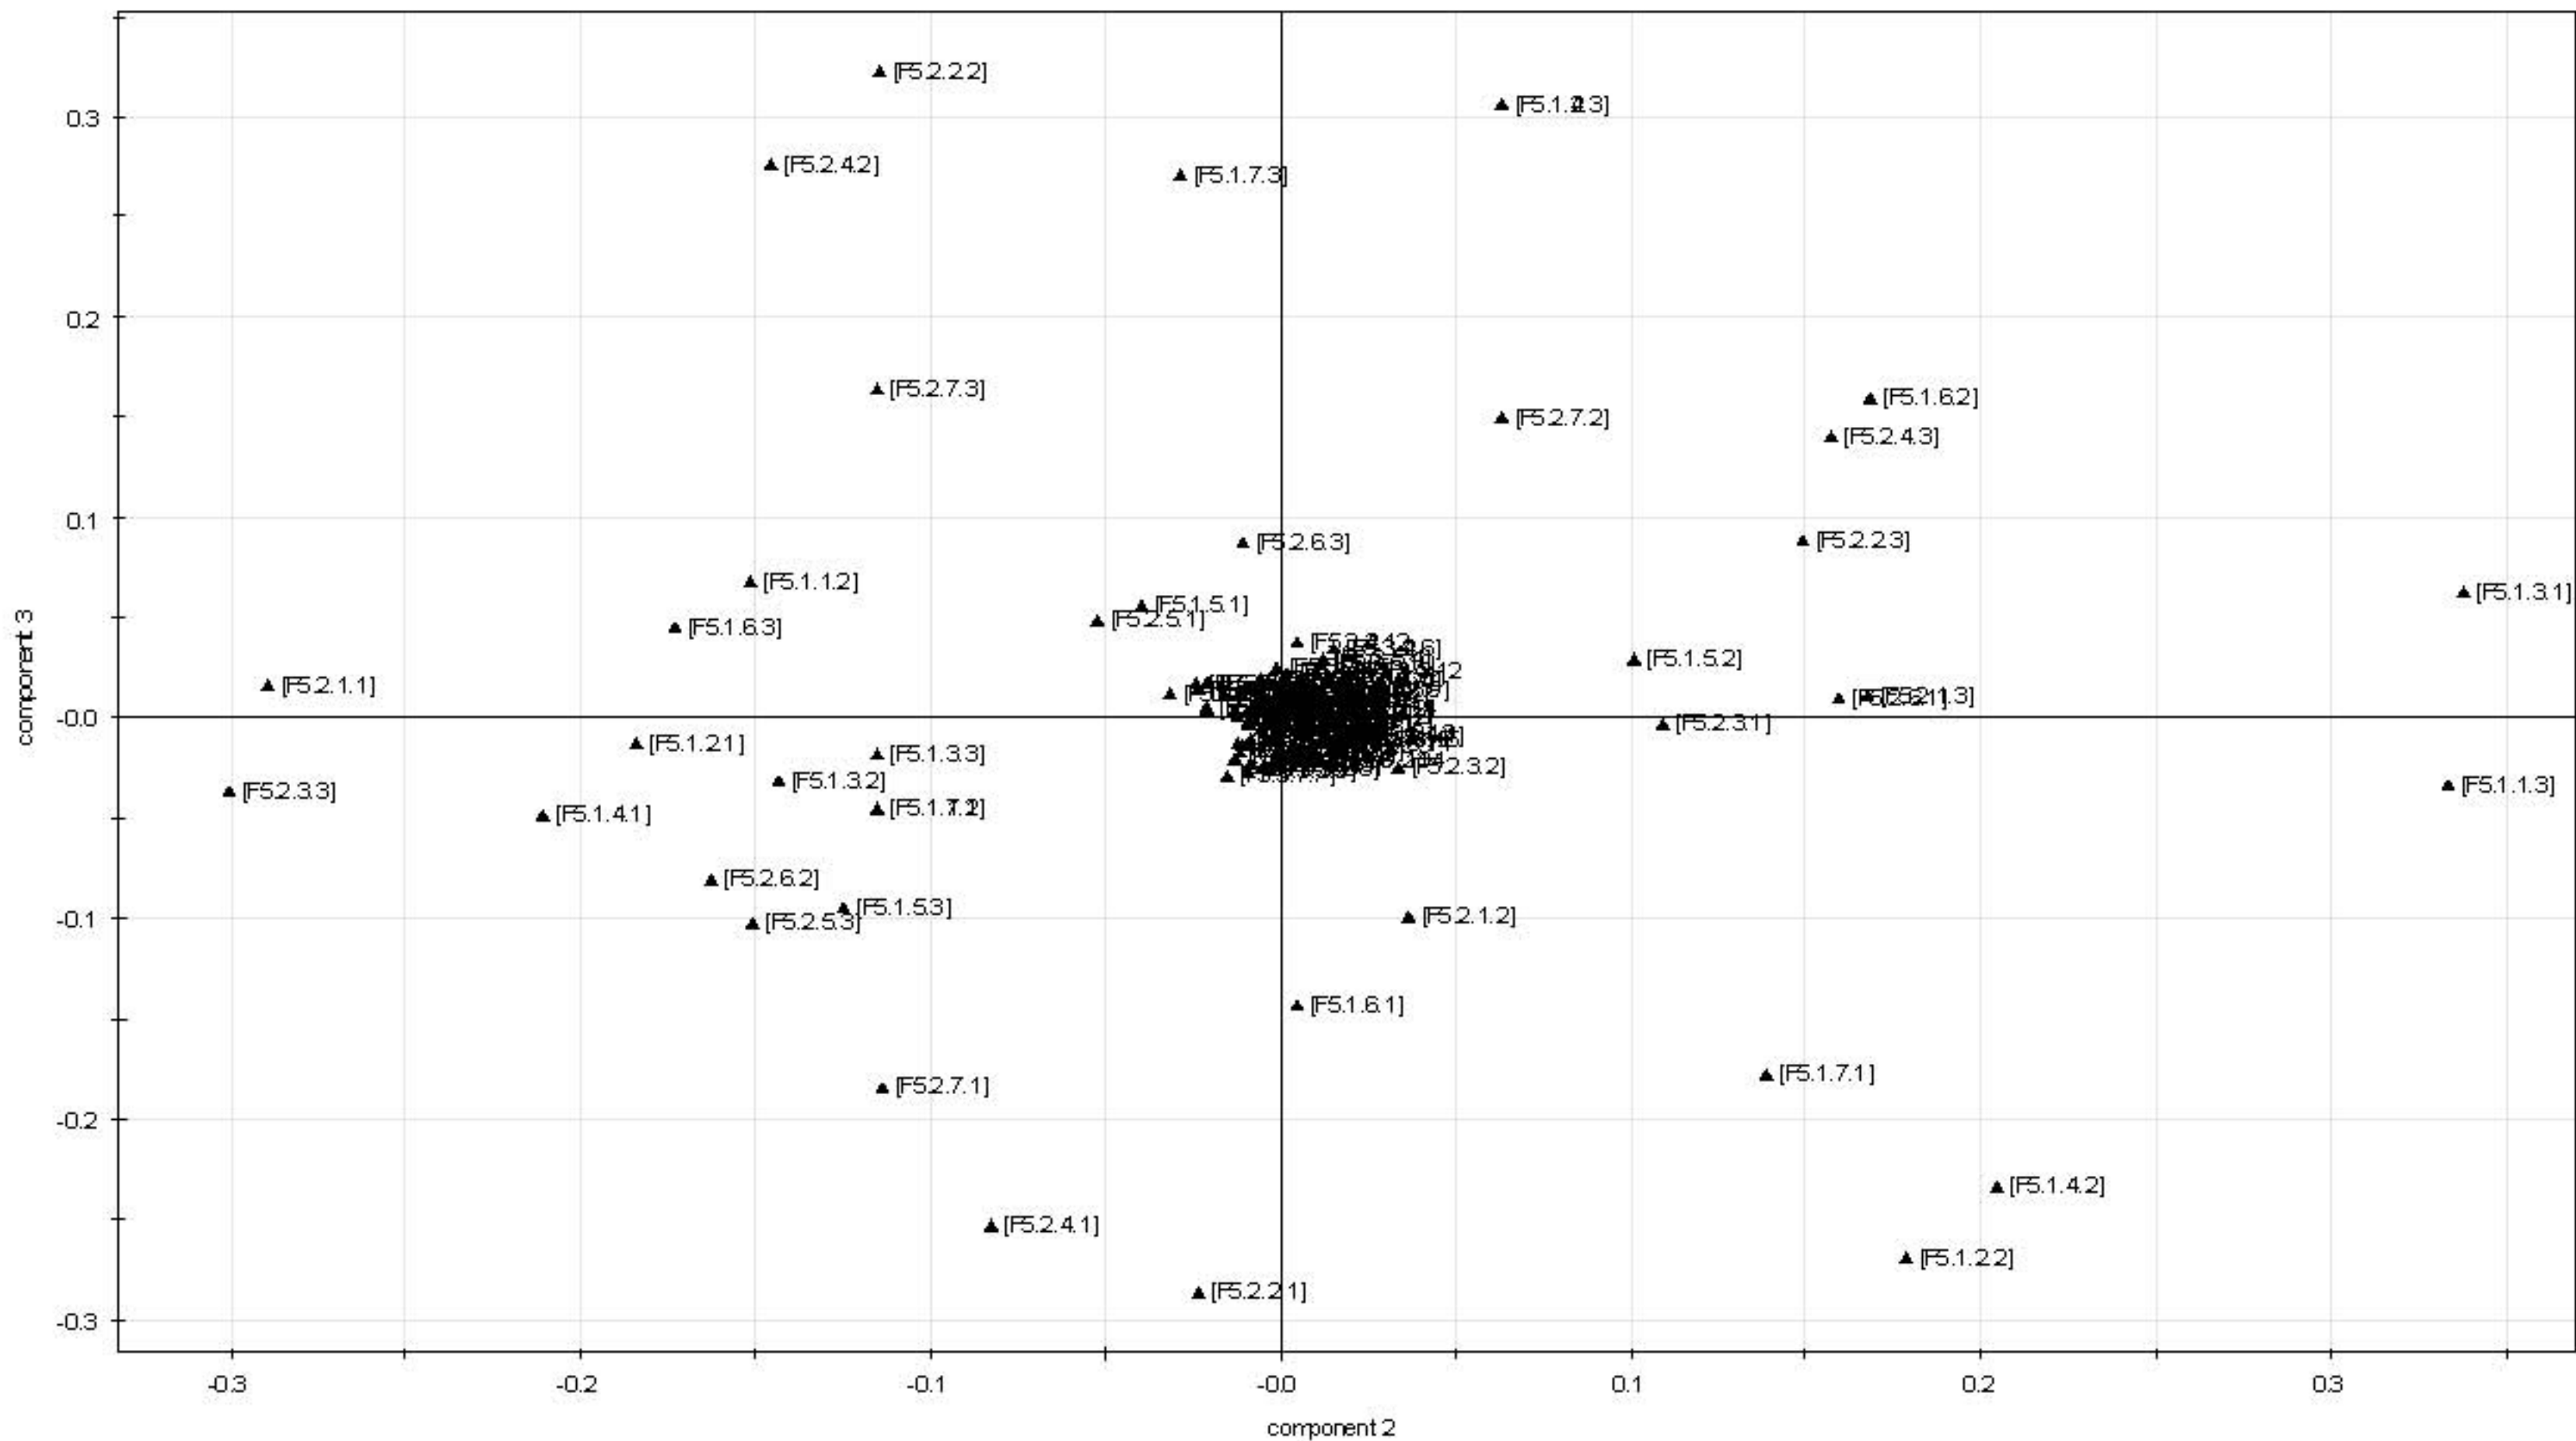

R2X[2] = 0.119381 R2X[3] = 0.0799481

Ligand Descriptors  
component 1 vs. component 2

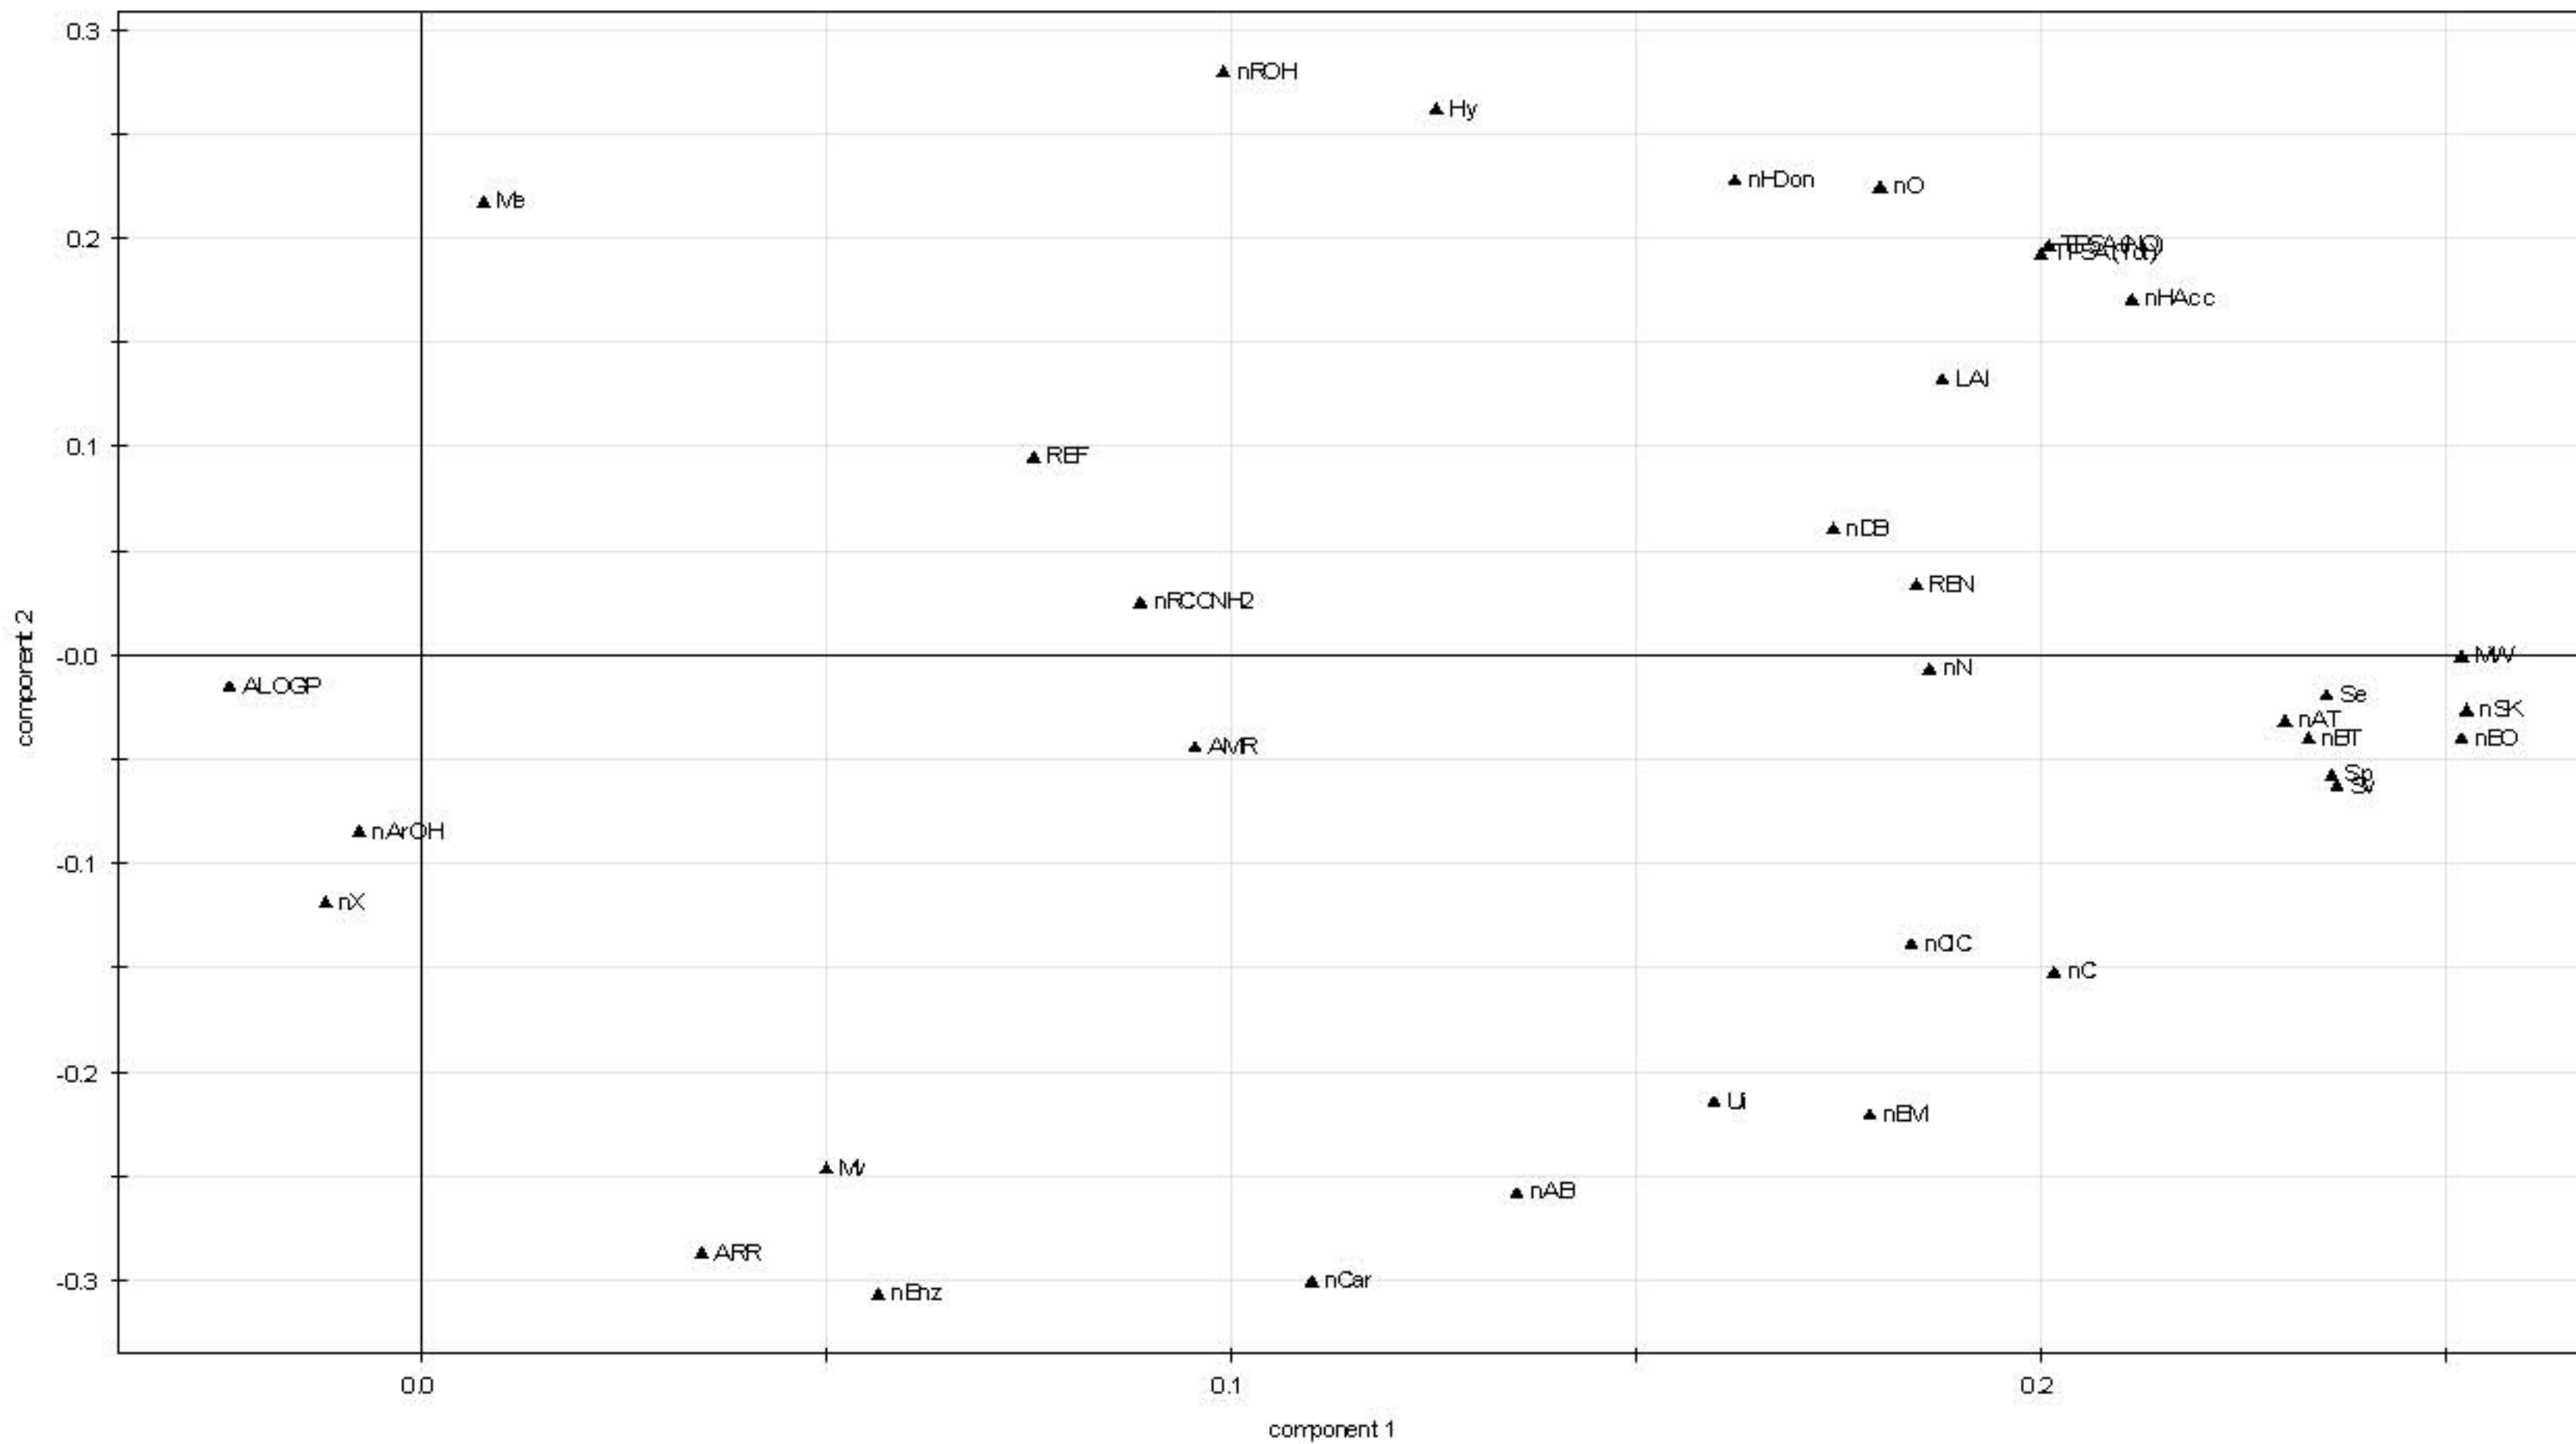

R2X[1] = 0.434032 R2X[2] = 0.202961

Ligand Descriptors  
component 2 vs. component 3

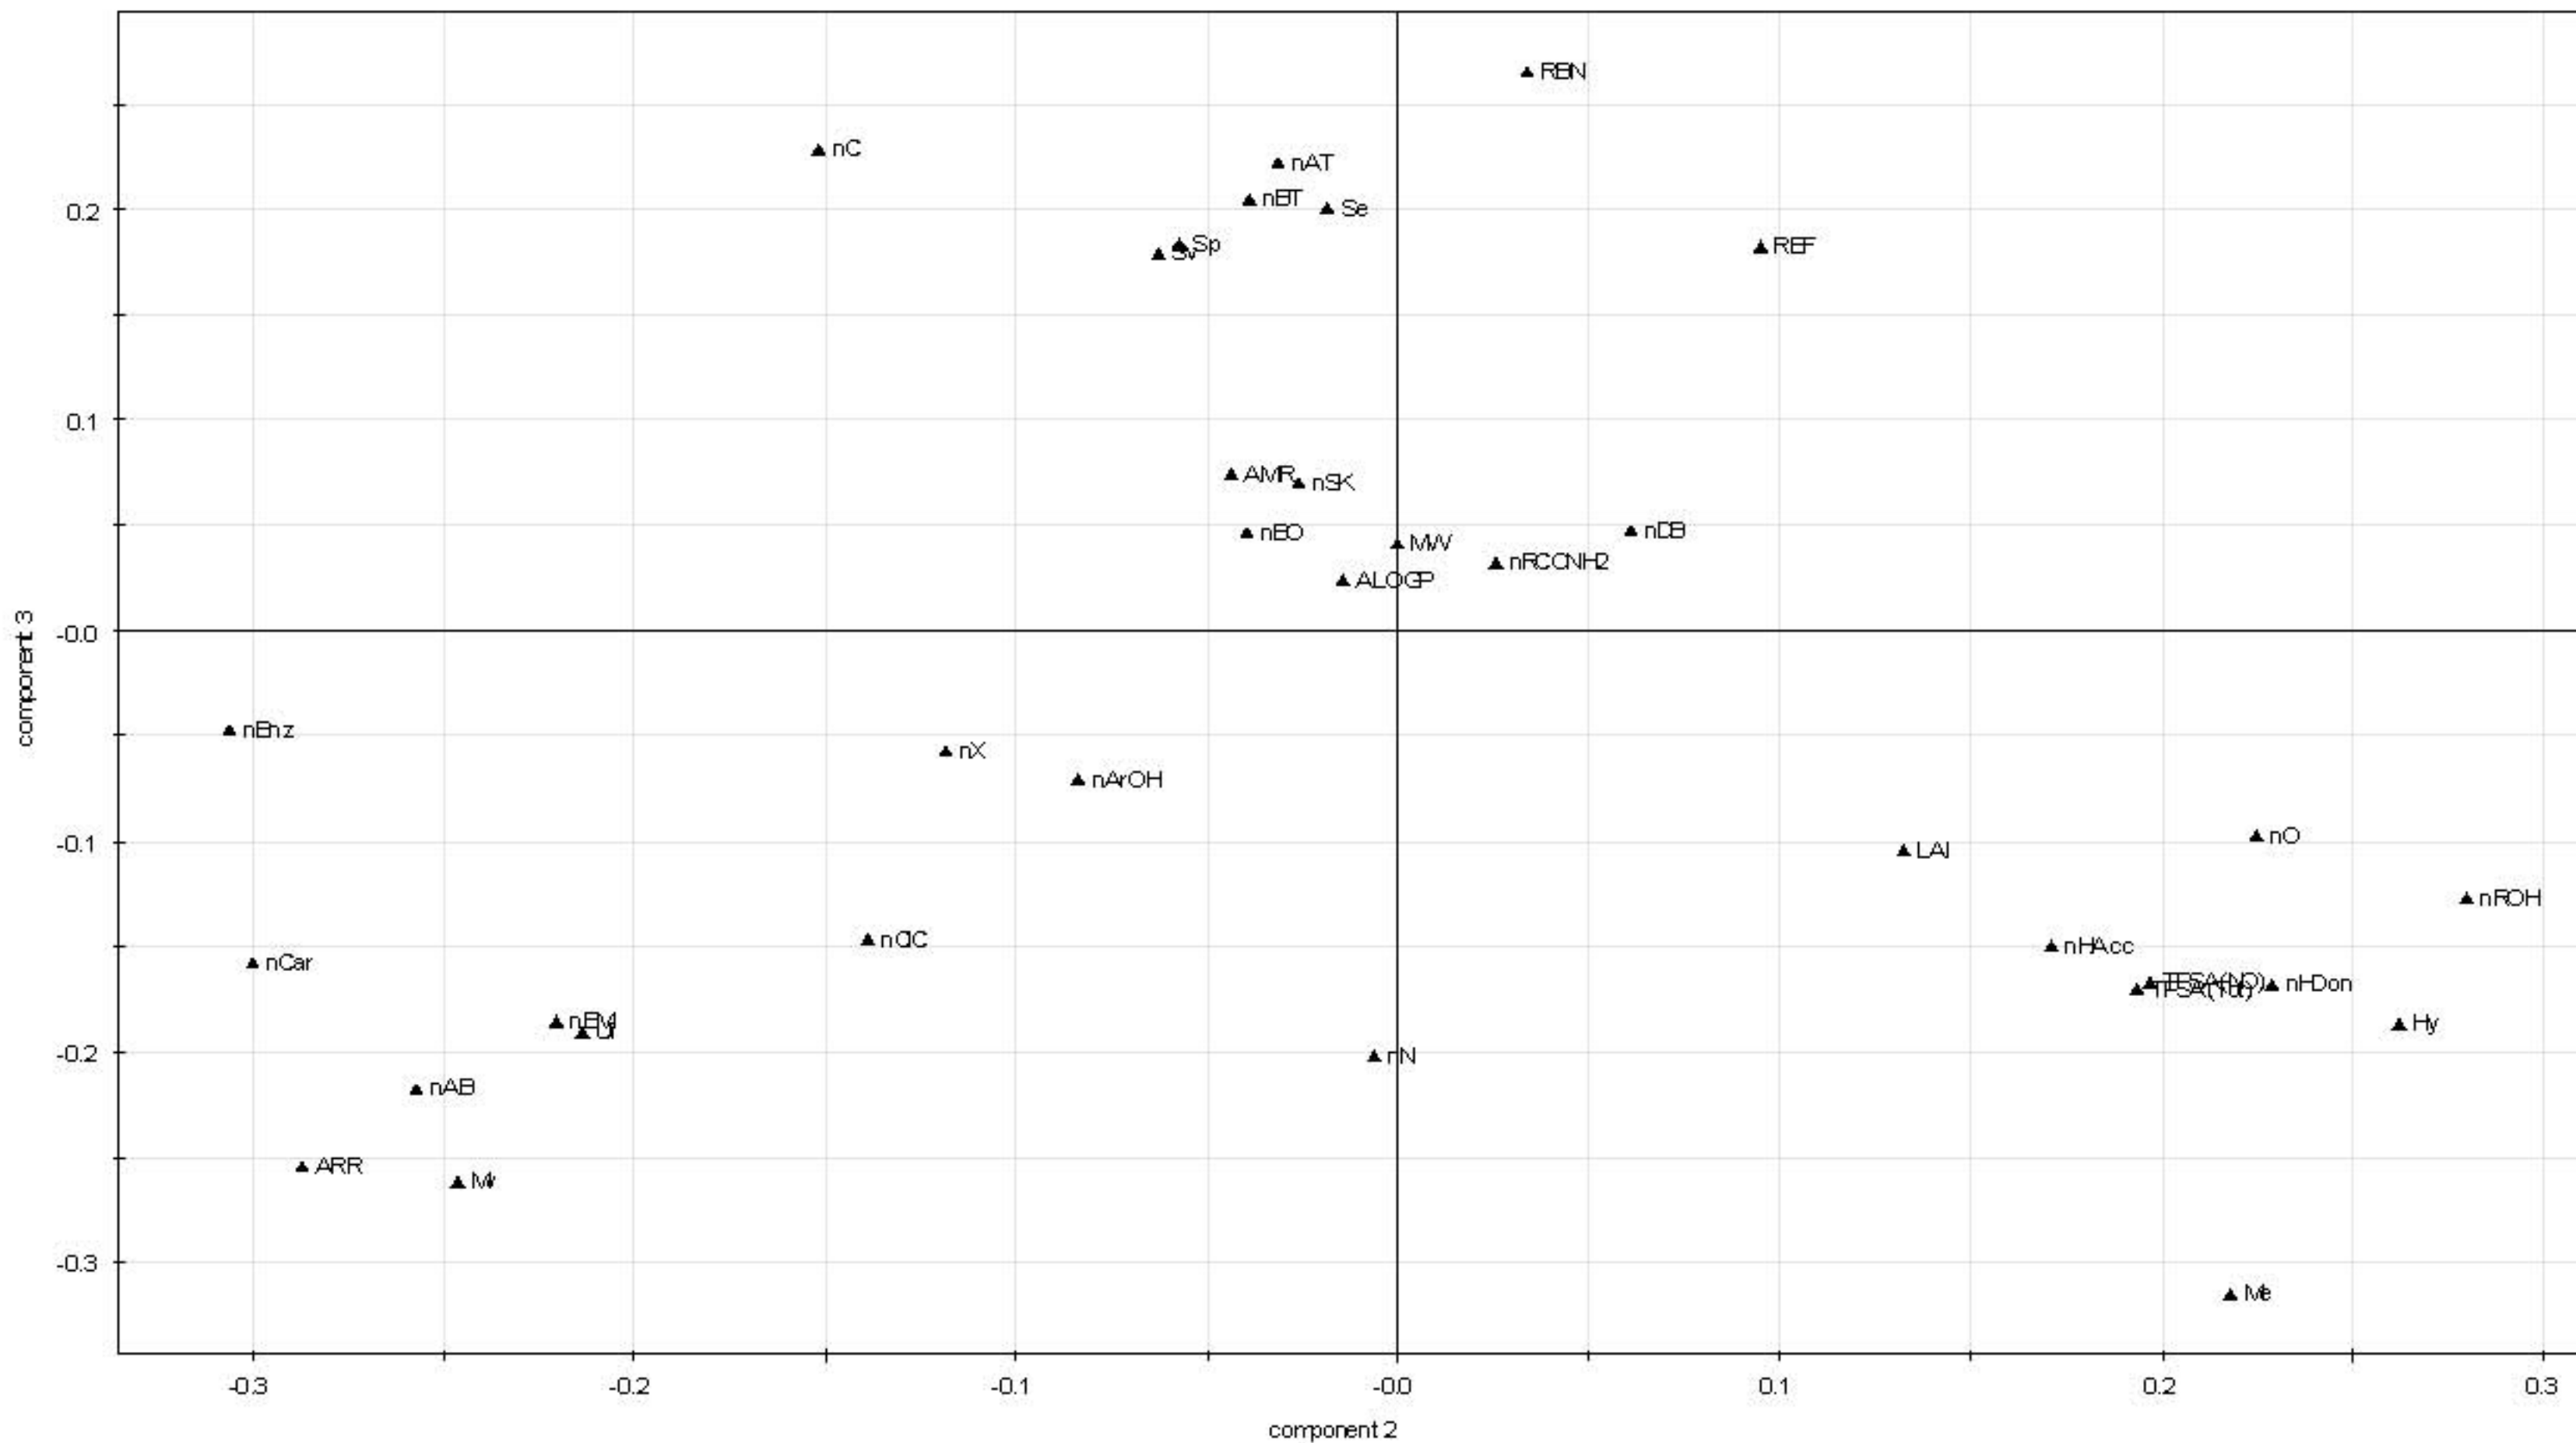

R2X[2] = 0.202961 R2X[3] = 0.0995723

Protein and Ligand Descriptors  
component 1 vs. component 2

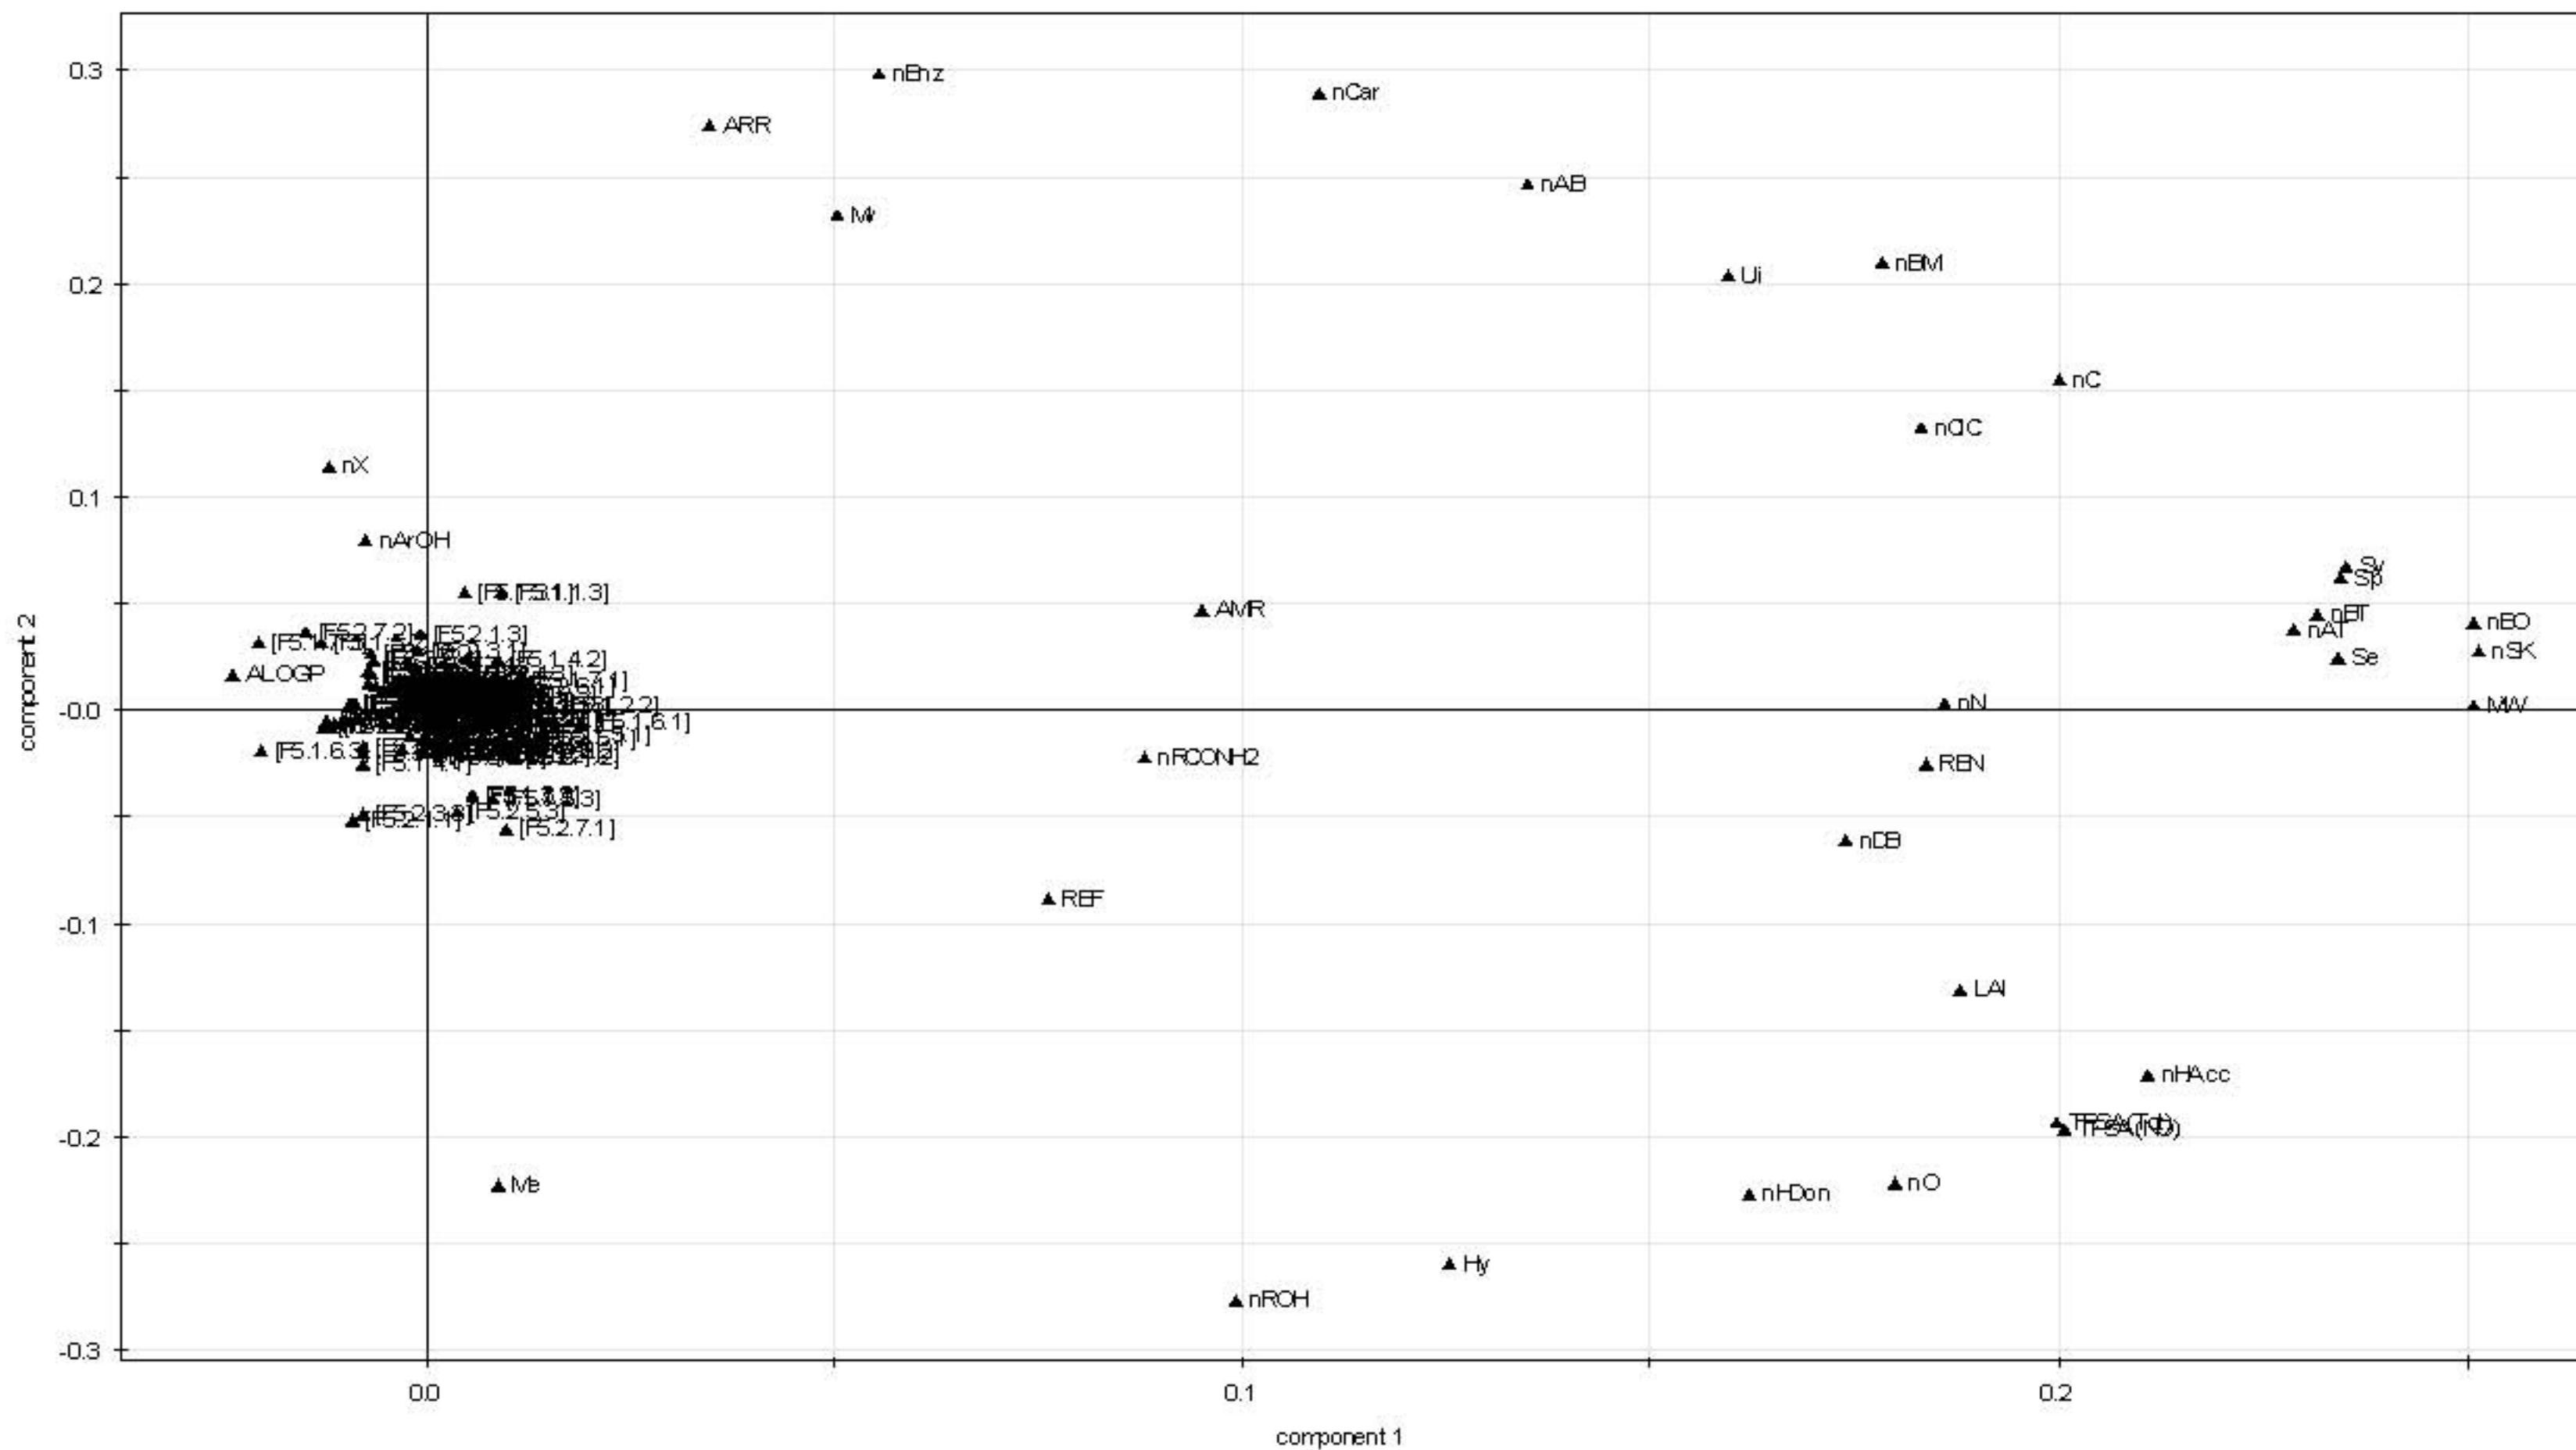

R2X[1] = 0.218138 R2X[2] = 0.10497
